# Supplementary material for: Viability of coastal fish larvae under ocean alkalinity enhancement: from organisms to communities
Source: Copernicus journal article supplement (doi:10.5194/egusphere-2024-286), 2024-02-15
Supplement: Supplementary file 1 [file egusphere-2024-286-supplement.pdf]

## Supplementary information

Viability of coastal fish larvae under ocean alkalinity enhancement: from organisms to communities  
by Goldenberg et al.

### Detailed description of metabolic rate estimates in the laboratory experiment:

Routine metabolic rate (RMR) was measured on individual larvae following Berg et al. (2020). Larvae were collected from the tanks before the lights went on in the morning (i.e. with empty guts) and placed in a container with filtered seawater from the tanks (0.2 µm). Then they were introduced individually in screw-top glass vials with integrated oxygen sensor (4 or 20 mL). Oxygen consumption was tracked for 1.5 h in dark conditions using a 4-channel fiber-optic oxygen meter (FireSting O<sub>2</sub>, PyroScience GmbH). Temperature was kept constant throughout the measurements (8.4 - 8.5 °C). Oxygen sensors were calibrated before each trial day. Oxygen partial pressure was continuously measured and never decreased below 80%. Background respiration was assessed through vials filled with filtered water (0.2 µm) from each tank. Oxygen respiration in these procedural controls was <20% (typically <5%) of those in vials with larvae. The mean respiration across all procedural controls from each day was used to correct the routine metabolic rate of the larvae (nmol O<sub>2</sub> ind<sup>-1</sup> h<sup>-1</sup>). After each trial, larvae were anesthetized with MS222 (0.1 g L<sup>-1</sup>), photographed, euthanized by an anesthetic overdose and frozen at -20 °C. Dry mass was estimated for each larva after freeze drying. Mass-specific routine metabolic rate (RMR<sub>m</sub>, nmol O<sub>2</sub> mg fish<sup>-1</sup> h<sup>-1</sup>) was estimated following Howald et al. (2022). Routine metabolic rate was divided by larval dry weight (resulting in RMR<sub>raw</sub>) and then corrected for allometric scaling with the following formula:

$$RMR_m = RMR_{raw} \cdot \left( \frac{DM}{DM_{mean}} \right)^{1-coeff_{Larvae}}$$

DM is larval dry mass (mg), DM<sub>mean</sub> the mean DM of all tested larvae and coeff<sub>Larvae</sub> (0.8859) a general allometric scaling coefficient for herring larvae estimated in Moyano et al. (2018).

**Table S1: Linear models to establish that *mineral* was not a dominant driver of fish in the mesocosms.** ΔTA (continuous), *mineral* (categorical) and their interaction were employed as explanatory variables (type III test). In all further analyses, only ΔTA is used as explanatory variable and simply referred to as OAE.

| Response variable                                                 | Source of variation | MS    | df | F-ratio | p-value |
|-------------------------------------------------------------------|---------------------|-------|----|---------|---------|
| a) Mortality longer-term (all taxa days 7-53)                     | ΔTA                 | 12    | 1  | 0.06    | 0.818   |
|                                                                   | Mineral             | 192   | 1  | 0.93    | 0.373   |
|                                                                   | ΔTA × Mineral       | 0     | 1  | 0.00    | 0.976   |
|                                                                   | Residuals           | 207   | 6  |         |         |
| b) Abundance (all taxa day 54)                                    | ΔTA                 | 2     | 1  | 0.00    | 0.949   |
|                                                                   | Mineral             | 333   | 1  | 0.82    | 0.401   |
|                                                                   | ΔTA × Mineral       | 180   | 1  | 0.44    | 0.532   |
|                                                                   | Residuals           | 409   | 6  |         |         |
| d) Per capita size (all taxa day 54)<br><i>log 10 transformed</i> | ΔTA                 | 0.270 | 1  | 5.00    | 0.067   |
|                                                                   | Mineral             | 0.038 | 1  | 0.69    | 0.437   |
|                                                                   | ΔTA × Mineral       | 0.063 | 1  | 1.17    | 0.321   |
|                                                                   | Residuals           | 0.054 | 6  |         |         |
| e) Biomass (all taxa day 54)                                      | ΔTA                 | 11.9  | 1  | 10.92   | 0.016   |
|                                                                   | Mineral             | 0.0   | 1  | 0.00    | 0.994   |
|                                                                   | ΔTA × Mineral       | 0.8   | 1  | 0.78    | 0.412   |
|                                                                   | Residuals           | 0.8   | 6  |         |         |

MS = mean squares; df = degrees of freedom

**Table S2: Statistical tests for response of herring larvae to OAE in the laboratory**, to accompany figure 3. **a-c)** Linear mixed models with individuals fish as lowest level of replication employing *OAE* as categorical fixed effect and *tank* as random effect (random intercept, restricted maximum likelihood fit, Satterthwaite approximation, (Bates et al. 2015; Kuznetsova et al. 2017). **d)** Simple pairwise comparison with tanks as lowest level of replication.

| Response variable                | Day | Source of variation | MS      | df <sub>Num</sub> | df <sub>Den</sub> | F-ratio | p-value | Tank effect p-value |
|----------------------------------|-----|---------------------|---------|-------------------|-------------------|---------|---------|---------------------|
| <b>a)</b> Routine metabolic rate | 22  | OAE                 | 143     | 1                 | 19                | 1.90    | 0.184   | 1                   |
|                                  | 27  | OAE                 | 8.39    | 1                 | 22                | 0.01    | 0.911   | 1                   |
|                                  | 37  | OAE                 | 323     | 1                 | 8                 | 2.23    | 0.174   | 1                   |
| <b>b)</b> Time moving            | 27  | OAE                 | 24.8    | 1                 | 27                | 1.84    | 0.187   | 1                   |
|                                  | 31  | OAE                 | 3.17    | 1                 | 4                 | 0.16    | 0.708   | 0.040               |
|                                  | 35  | OAE                 | 367     | 1                 | 4                 | 2.08    | 0.223   | 0.354               |
| Pause frequency                  | 27  | OAE                 | 10.2    | 1                 | 4                 | 0.59    | 0.485   | 0.230               |
|                                  | 31  | OAE                 | 2.76    | 1                 | 4                 | 0.18    | 0.692   | 0.048               |
|                                  | 35  | OAE                 | 0.757   | 1                 | 4                 | 0.01    | 0.911   | 0.525               |
| Pause duration                   | 27  | OAE                 | 0.0777  | 1                 | 3.7               | 7.09    | 0.058   | 0.451               |
|                                  | 31  | OAE                 | 0.00107 | 1                 | 4.2               | 0.05    | 0.836   | 0.069               |
|                                  | 35  | OAE                 | 0.0484  | 1                 | 4                 | 0.24    | 0.648   | 0.046               |
| <b>c)</b> Growth                 | 22  | OAE                 | 1.86    | 1                 | 4                 | 1.96    | 0.235   | 0.806               |
|                                  | 28  | OAE                 | 0.0146  | 1                 | 4.1               | 0.01    | 0.928   | 0.582               |
|                                  | 37  | OAE                 | 0.0528  | 1                 | 4                 | 0.05    | 0.832   | 0.272               |
| <b>d)</b> Survival               | 37  | OAE                 | 24.0    | 1                 | 4                 | 0.65    | 0.465   | na                  |

MS = mean squares; df<sub>Num</sub> and df<sub>Den</sub> = numerator and denominator degrees of freedom

**Table S3: Linear regressions for the response of fish to OAE in the mesocosms**, to accompany figure 4.

| Response variable                                          | Source of variation | MS    | df | F-ratio | p-value |
|------------------------------------------------------------|---------------------|-------|----|---------|---------|
| <b>a)</b> Mortality longer-term (all taxa, days 7-53)      | OAE                 | 192   | 1  | 1.19    | 0.306   |
|                                                            | Residuals           | 161   | 8  |         |         |
| <b>b)</b> Mortality shorter-term (herring only, days 7-15) | OAE                 | 5.0   | 1  | 0.11    | 0.747   |
|                                                            | Residuals           | 44.7  | 8  |         |         |
| <b>c)</b> Per capita size (all taxa day 54)                | OAE                 | 0.270 | 1  | 5.56    | 0.046   |
|                                                            | Residuals           | 0.049 | 8  |         |         |
| <b>d)</b> Abundance (all taxa day 54)                      | OAE                 | 2     | 1  | 0.01    | 0.945   |
|                                                            | Residuals           | 349   | 8  |         |         |
| <b>e)</b> Biomass (all taxa day 54)                        | OAE                 | 11.9  | 1  | 10.53   | 0.012   |
|                                                            | Residuals           | 1.1   | 8  |         |         |

MS = mean squares; df = degrees of freedom

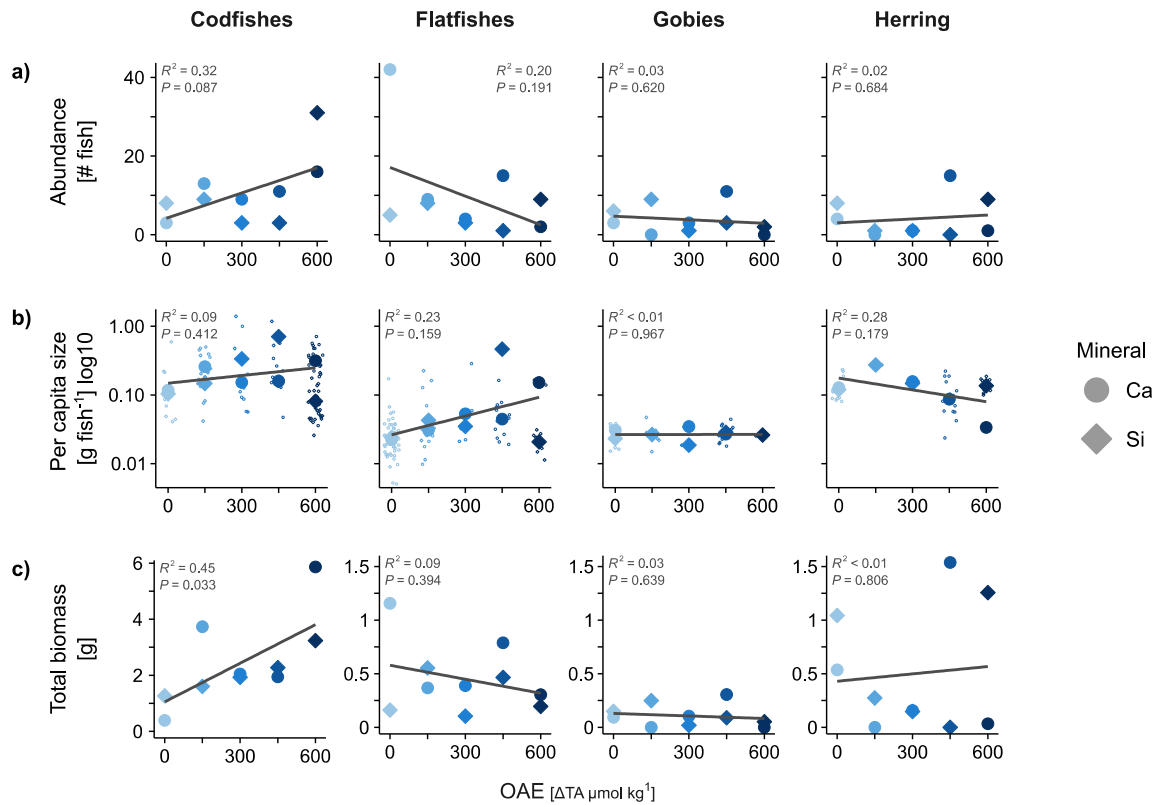

**Figure S1: Responses of individual fish taxa to OAE, assessed at the end of the mesocosm experiment.** Count (a), individual size (b) and total biomass (c) of live fish. Larger points represent mesocosms and smaller points in b single individuals. Linear regressions test for an OAE effect.

**Table S4: Linear regressions for the response of other functional groups (a-c) and predation on herring (d) under OAE in the mesocosms, to accompany figure 5.**

| Response variable            | Source of variation | MS     | df | F-ratio | p-value |
|------------------------------|---------------------|--------|----|---------|---------|
| a) Chlorophyll a (days 7-53) | OAE                 | 0.0034 | 1  | 0.147   | 0.711   |
|                              | Residuals           | 0.0233 | 8  |         |         |
| b) Copepods (days 7-53)      | OAE                 | 0.5    | 1  | 0.05    | 0.832   |
|                              | Residuals           | 10.4   | 8  |         |         |
| c) Hydrozoa (days 7-53)      | OAE                 | 16.0   | 1  | 0.47    | 0.511   |
|                              | Residuals           | 33.8   | 8  |         |         |
| d) Fish missing (days 7-54)  | OAE                 | 51     | 1  | 0.44    | 0.524   |
|                              | Residuals           | 115    | 8  |         |         |

MS = mean squares; df = degrees of freedom

## References

- Bates D, Machler M, Bolker BM and Walker SC (2015) Fitting Linear Mixed-Effects Models Using lme4. *Journal of Statistical Software*, 67:1-48.
- Berg F, Andersson L and Folkvord A (2020) Respiration rates of herring larvae at different salinities, and effects of previous environmental history. *Marine Ecology Progress Series*, 650:141-152.
- Howald S, Moyano M, Crespel A, Kuchenmüller LL, Cominassi L, Claireaux G, Peck MA and Mark FC (2022) Effects of ocean acidification over successive generations decrease resilience of larval European sea bass to ocean acidification and warming but juveniles could benefit from higher temperatures in the NE Atlantic. *Journal of Experimental Biology*, 225:jeb243802.
- Kuznetsova A, Brockhoff PB and Christensen RHB (2017) lmerTest Package: Tests in Linear Mixed Effects Models. *Journal of Statistical Software*, 82:1-26.
- Moyano M, Illing B, Christiansen L and Peck MA (2018) Linking rates of metabolism and growth in marine fish larvae. *Marine Biology*, 165.
